# Supplementary material
Source: PubMed Central journal article supplement (PMC9599359)
Supplement: aem.00922-22-s0001.pdf [file aem.00922-22-s0001.pdf]

1 **Supporting Information**

2 Balancing trade-offs imposed by growth media and mass spectrometry for exometabolomics

3 Ann E. Donnelly, Nithya Narayanan, Caroline Birer-Williams, Travis J. DeWolfe, Rosalie K. Chu,

4 Christopher R. Anderton, Erik S. Wright

5

6

7 Content:

8 SI Figure 1 – Scans of SubTap context and analysis plates

9 SI Figure 2 – Frequency of matches to *Streptomyces*-produced compounds found in Natural

10 Products Atlas, by media type

11 SI Figure 3 - Correlation of Natural Products Atlas hits to *Streptomyces* isolate genetic

12 relatedness

13 SI Table 1 - Putative identifications of compounds named in SI Figs. 2 and 3.

14

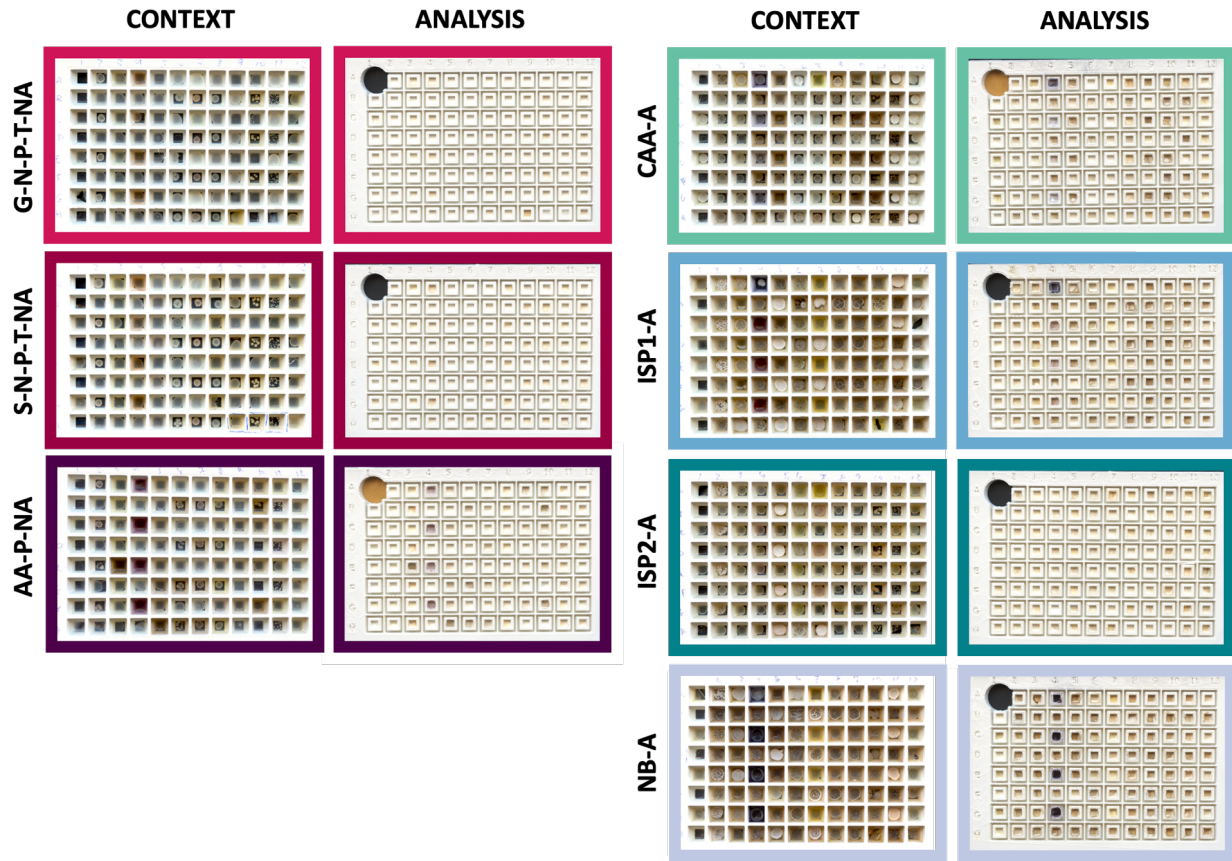

SI Figure 1. Pictures of SubTap analysis plates used in this study.

15

16

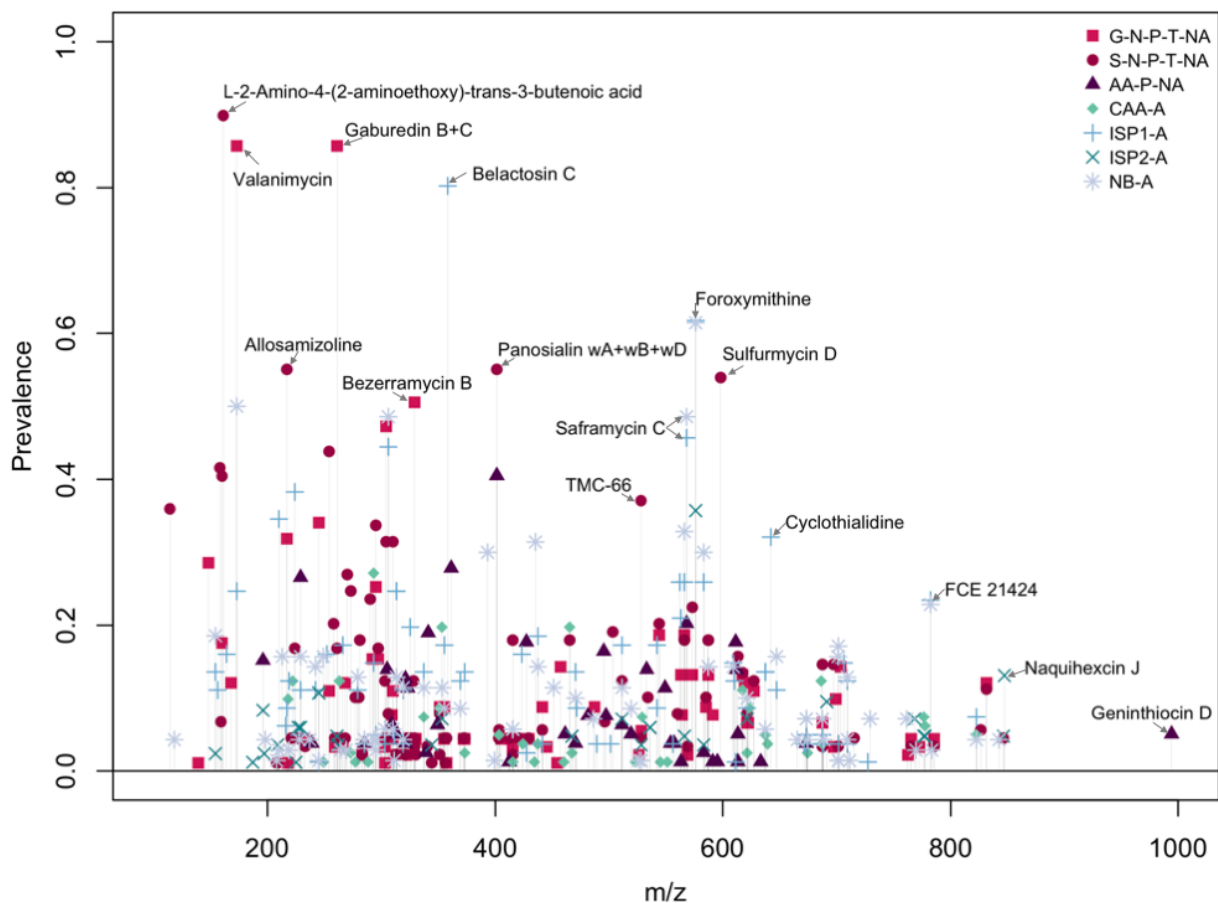

**SI Figure 2.** Frequency of matches to *Streptomyces*-produced compounds found in the Natural Products Atlas, by media type. Named compounds depicted in figure are putatively annotated – level 3 (as defined in Sumner *et. al.*<sup>1</sup>). See **SI Table 1** for additional information.

17  
18

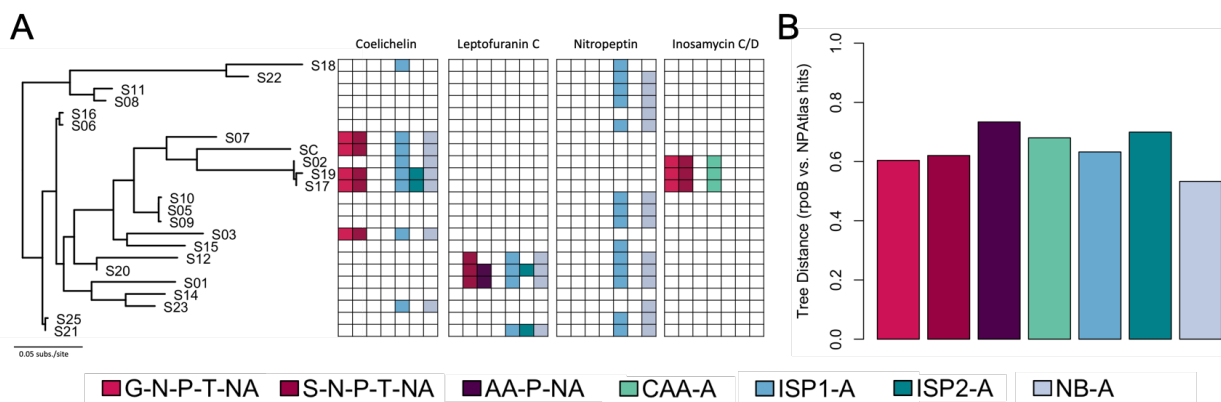

**SI Figure 3.** Correlation of Natural Products Atlas hits to *Streptomyces* isolate relatedness. **(A)** *Streptomyces* phylogenetic tree based on the *rpoB* gene, and detection of four *Streptomyces*-produced compounds: coelichelin, leptofuranin C, nitropeptin and inosamycin C/D, by media and isolate. **(B)** Distance between the *rpoB* tree and Natural Products Atlas hit tree (see methods); lower value indicates closer match.

19  
20

21 **SI Table 1.** Putative annotations (level 3) of 19 compounds named in **SI Figs. 2 and 3**. Compound  
 22 names are reported as listed in the Natural Products Atlas.  
 23

| Compound Name                                  | Molecular Formula | Monoisotopic Mass | Medium     | Adduct    | Measured $m/z$ | Error (ppm) |
|------------------------------------------------|-------------------|-------------------|------------|-----------|----------------|-------------|
| L-2-amino-4-pentynoic acid                     | C5H7NO2           | 113.0477          | S-N-P-T-NA | M+H       | 114.0547       | 1.9         |
|                                                |                   |                   |            | M+K       | 152.0105       | 2.3         |
| Valanimycin                                    | C7H12N2O3         | 172.0848          | G-N-P-T-NA | M+H       | 173.0921       | 0.4         |
|                                                |                   |                   |            | M+Na      | 195.0740       | 0.2         |
|                                                |                   |                   |            | M+K       | 211.0480       | 0.4         |
|                                                |                   |                   | ISP1-A     | M+Na      | 195.0735       | 2.5         |
|                                                |                   |                   |            | M+K       | 211.0474       | 2.6         |
|                                                |                   |                   | NB-A       | M+H       | 173.0916       | 2.6         |
|                                                |                   |                   |            | M+Na      | 195.0735       | 2.5         |
|                                                |                   |                   |            | M+K       | 211.0475       | 2.4         |
| Allosamizoline                                 | C9H16N2O4         | 216.1110          | G-N-P-T-NA | M+H       | 217.1185       | 0.9         |
|                                                |                   |                   |            | M+K       | 255.0742       | 0.2         |
|                                                |                   |                   | S-N-P-T-NA | M+H       | 217.1178       | 2.1         |
|                                                |                   |                   |            | M+Na      | 239.0997       | 2.3         |
|                                                |                   |                   |            | M+K       | 255.0736       | 2.2         |
| Gaburedin B; Gaburedin C                       | C11H20N2O5        | 260.1372          | G-N-P-T-NA | M+H       | 261.1445       | 0.1         |
|                                                |                   |                   |            | M+K       | 299.1004       | 0.1         |
|                                                |                   |                   | S-N-P-T-NA | M+H       | 261.1439       | 2.4         |
|                                                |                   |                   |            | M+Na      | 283.1281       | 5.9         |
| Nitropeptin                                    | C11H19N3O7        | 305.1223          | ISP1-A     | M+Na      | 328.1108       | 2.2         |
|                                                |                   |                   |            | M+K       | 344.0847       | 2.4         |
|                                                |                   |                   | NB-A       | M+Na      | 328.1107       | 2.5         |
|                                                |                   |                   |            | M+K       | 344.0846       | 2.5         |
| Bezerramycin B                                 | C16H12N2O6        | 328.0695          | G-N-P-T-NA | M+H       | 329.0745       | 7.0         |
|                                                |                   |                   |            | M+K       | 367.0304       | 6.2         |
| Belactosin C                                   | C16H27N3O6        | 357.1900          | ISP1-A     | M+Na      | 380.1784       | 2.1         |
|                                                |                   |                   |            | M+K       | 396.1522       | 2.3         |
| Panosialin wD; Panosialin wA;<br>Panosialin wB | C21H36O5S         | 400.2284          | S-N-P-T-NA | M+H       | 401.2383       | 6.7         |
|                                                |                   |                   |            | M+K       | 439.1941       | 6.0         |
|                                                |                   |                   | AA-P-NA    | M+H       | 401.2342       | 3.6         |
|                                                |                   |                   |            | M+K       | 439.1895       | 4.5         |
| Leptofuranin C                                 | C32H46O5          | 510.3345          | S-N-P-T-NA | M+H       | 511.3444       | 5.2         |
|                                                |                   |                   |            | M+Na      | 533.3262       | 4.5         |
|                                                |                   |                   |            | M+K       | 549.3003       | 4.7         |
|                                                |                   |                   | AA-P-NA    | M+H       | 511.3390       | 5.4         |
|                                                |                   |                   |            | M+Na      | 533.3221       | 3.0         |
|                                                |                   |                   |            | M+K       | 549.2944       | 6.0         |
|                                                |                   |                   | ISP1-A     | M+H       | 511.3444       | 5.2         |
|                                                |                   |                   |            | M+Na      | 533.3262       | 4.5         |
|                                                |                   |                   |            | M+K       | 549.3002       | 4.5         |
|                                                |                   |                   | ISP2-A     | M+H       | 511.3439       | 4.1         |
|                                                |                   |                   |            | M+Na      | 533.3269       | 5.9         |
|                                                |                   |                   |            | M+K       | 549.2996       | 3.4         |
|                                                |                   |                   | NB-A       | M+H       | 511.3446       | 5.5         |
|                                                |                   |                   |            | M+K       | 549.3003       | 4.8         |
|                                                |                   |                   | TMC-66     | C29H21NO9 | 527.1216       | S-N-P-T-NA  |
| M+K                                            | 566.0867          | 3.3               |            |           |                |             |

24  
 25  
 26  
 27

| Compound Name              | Molecular Formula | Monoisotopic Mass | Medium     | Adduct | Measured m/z | Error (ppm) |
|----------------------------|-------------------|-------------------|------------|--------|--------------|-------------|
| Coelichelin                | C21H39N7O11       | 565.2708          | G-N-P-T-NA | M+H    | 566.2778     | 0.5         |
|                            |                   |                   |            | M+K    | 604.2337     | 0.3         |
|                            |                   |                   | S-N-P-T-NA | M+H    | 566.2762     | 3.2         |
|                            |                   |                   |            | M+K    | 604.2320     | 3.1         |
|                            |                   |                   | ISP1-A     | M+H    | 566.2766     | 2.5         |
|                            |                   |                   |            | M+Na   | 588.2586     | 2.4         |
|                            |                   |                   | ISP2-A     | M+K    | 604.2326     | 2.2         |
|                            |                   |                   |            | M+H    | 566.2758     | 4.0         |
|                            |                   |                   | NB-A       | M+Na   | 588.2577     | 3.9         |
|                            |                   |                   |            | M+K    | 604.2315     | 4.0         |
|                            |                   |                   |            | M+H    | 566.2765     | 2.8         |
|                            |                   |                   |            | M+Na   | 588.2583     | 2.9         |
|                            | M+K               | 604.2324          | 2.4        |        |              |             |
| Saframycin C               | C29H33N3O9        | 567.2217          | ISP1-A     | M+H    | 568.2323     | 5.9         |
|                            |                   |                   |            | M+Na   | 590.2142     | 5.6         |
|                            |                   |                   |            | M+K    | 606.1881     | 5.4         |
|                            |                   |                   | NB-A       | M+H    | 568.2322     | 5.7         |
|                            |                   |                   |            | M+Na   | 590.2141     | 5.3         |
| Foroxymithine              | C22H37N7O11       | 575.2551          | ISP1-A     | M+H    | 576.2609     | 2.6         |
|                            |                   |                   |            | M+Na   | 598.2428     | 2.6         |
|                            |                   |                   | ISP2-A     | M+K    | 614.2167     | 2.6         |
|                            |                   |                   |            | M+Na   | 598.2420     | 3.9         |
|                            |                   |                   | NB-A       | M+K    | 614.2159     | 3.9         |
|                            |                   |                   |            | M+H    | 576.2608     | 2.7         |
|                            |                   |                   |            | M+Na   | 598.2427     | 2.7         |
|                            |                   |                   |            | M+K    | 614.2166     | 2.7         |
| Sulfurmycin D              | C31H35NO11        | 597.2210          | S-N-P-T-NA | M+H    | 598.2298     | 2.6         |
|                            |                   |                   |            | M+K    | 636.1856     | 2.3         |
| Inosamycin D; Inosamycin C | C23H44N4O15       | 616.2803          | G-N-P-T-NA | M+H    | 617.2886     | 1.6         |
|                            |                   |                   |            | M+Na   | 639.2707     | 1.8         |
|                            |                   |                   |            | M+K    | 655.2445     | 1.5         |
|                            |                   |                   | CAA-A      | M+H    | 617.2872     | 0.6         |
|                            |                   |                   |            | M+Na   | 639.2691     | 0.7         |
| Cyclothialidine            | C26H35N5O12S      | 641.2003          | ISP1-A     | M+H    | 642.2066     | 1.5         |
|                            |                   |                   |            | M+K    | 680.1624     | 1.5         |
| FCE 21424                  | C38H43N3O15       | 781.2694          | ISP1-A     | M+H    | 782.2773     | 0.8         |
|                            |                   |                   |            | M+Na   | 804.2592     | 0.6         |
|                            |                   |                   | NB-A       | M+H    | 782.2769     | 0.2         |
|                            |                   |                   |            | M+Na   | 804.2588     | 0.2         |
| Naquihexcin J              | C39H42O19S        | 846.2041          | ISP2-A     | M+H    | 847.2101     | 1.5         |
|                            |                   |                   |            | M+Na   | 869.1920     | 1.5         |
|                            |                   |                   |            | M+K    | 885.1658     | 1.6         |
| Geninthiocin D             | C44H43N13O13S     | 993.2824          | AA-P-NA    | M+H    | 994.2923     | 2.6         |
|                            |                   |                   |            | M+Na   | 1016.2732    | 1.6         |
|                            |                   |                   |            | M+K    | 1032.2467    | 1.1         |

28

29

30 **SI REFERENCES**

31

32 1. Sumner, L. W.; Amberg, A.; Barrett, D.; Beale, M. H.; Beger, R.; Daykin, C. A.; Fan, T.  
33 W.; Fiehn, O.; Goodacre, R.; Griffin, J. L.; Hankemeier, T.; Hardy, N.; Harnly, J.; Higashi, R.;  
34 Kopka, J.; Lane, A. N.; Lindon, J. C.; Marriott, P.; Nicholls, A. W.; Reily, M. D.; Thaden, J. J.;  
35 Viant, M. R., Proposed minimum reporting standards for chemical analysis Chemical Analysis  
36 Working Group (CAWG) Metabolomics Standards Initiative (MSI). *Metabolomics* **2007**, 3 (3),  
37 211-221.

38
